# Supplementary material
Source: MDPI journal article supplement (https://www.mdpi.com/2304-6740/5/1/16)

## **Supplementary Information**

### **On Mineral Retrosynthesis of a Complex Biogenic Scaffold**

Ashit Rao, José L. Arias and Helmut Cölfen

**Supplementary Video:**

Initial ethanol-mediated dehydration and subsequent hydration of the egg membrane observed using a light microscope in reflective mode.

**Figure S1.** Enrichment of  $\text{Ca}^{2+}$  ions by mammillae as depicted by fluorescence microscopy of a decalcified, calcein-stained egg membrane. Scale bar represents 50  $\mu\text{m}$ . Inset represents an image at a lower magnification.

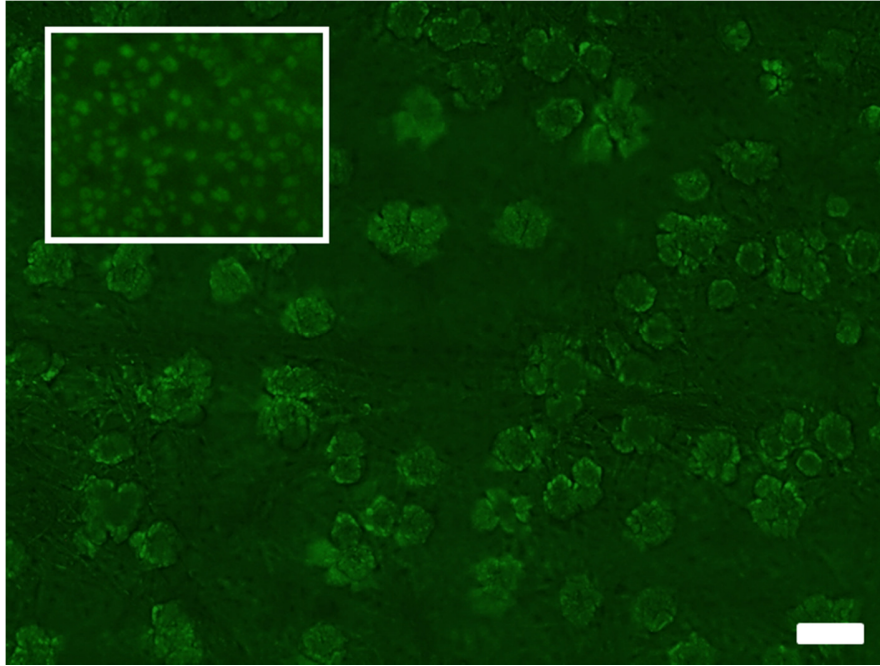

**Figure S2.** FTIR spectra of egg membranes mineralized in the presence of 0 (black), 2 (red), 5 (blue) and 10 (pink) mM  $\text{Mg}^{2+}$  ion content and different polymeric additives.

**(A) Reference experiment**

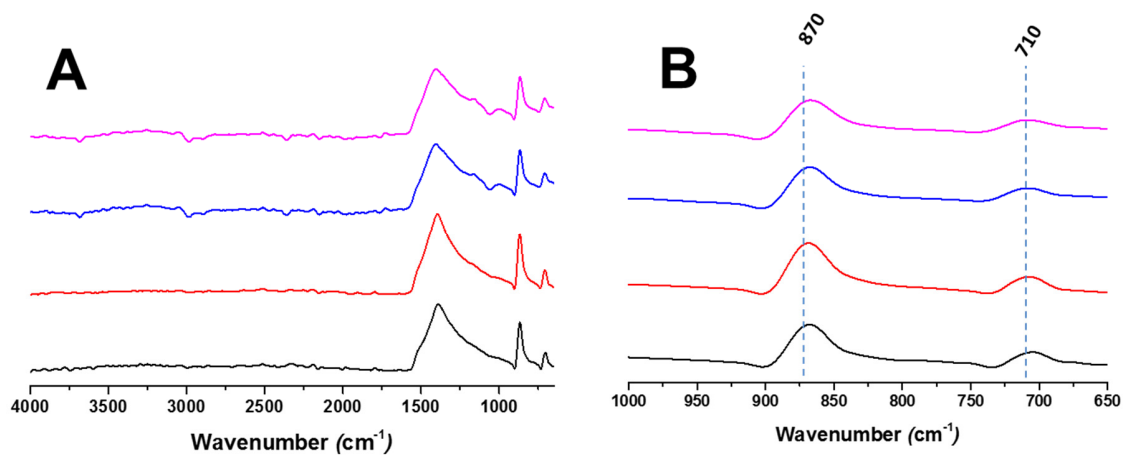

**(B) PEG**

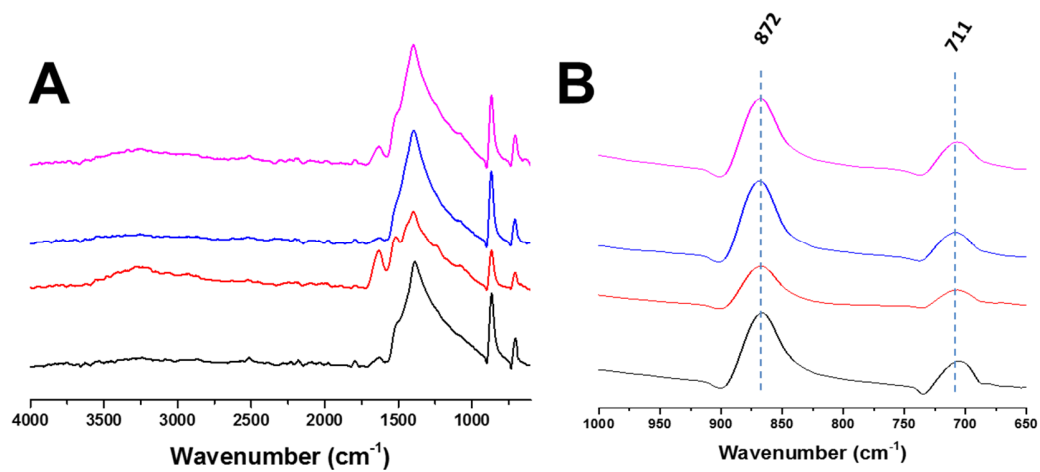

**(C) PAA 5000**

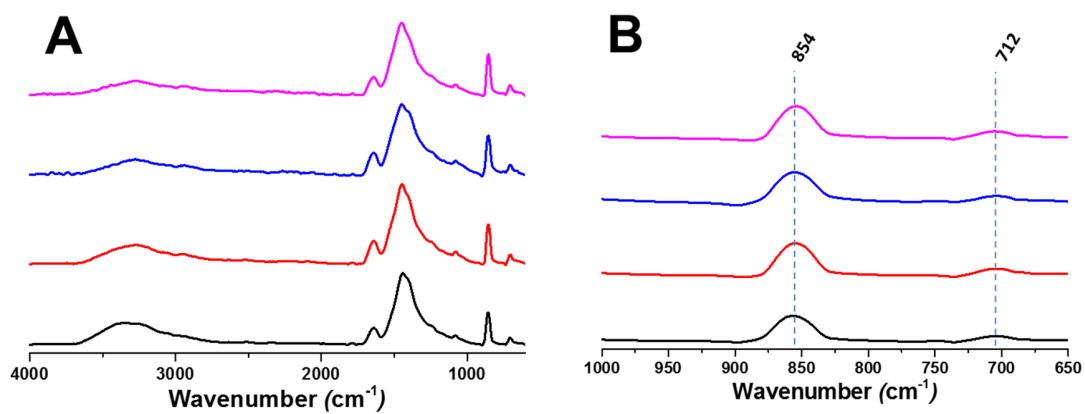

**(D) PAA 35000**

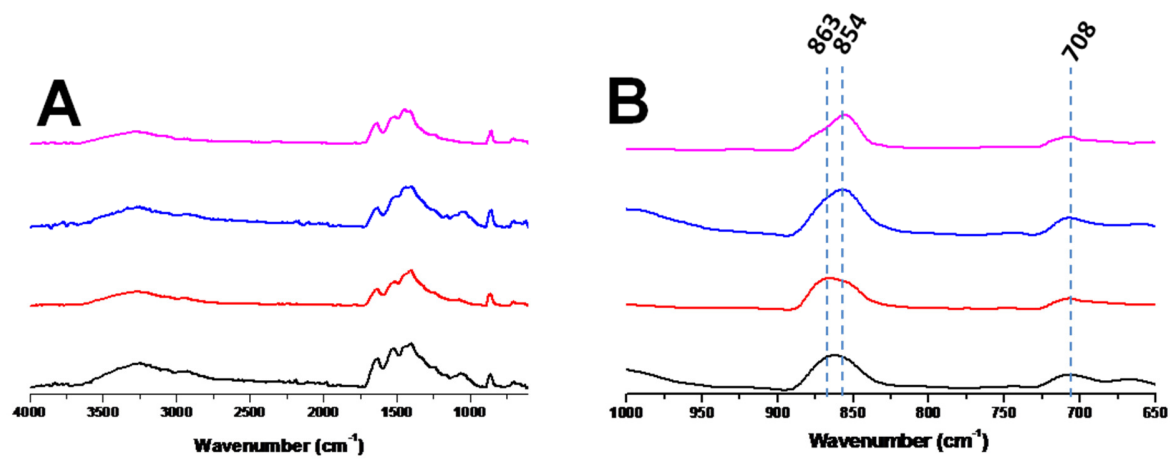

**(E) PASP**

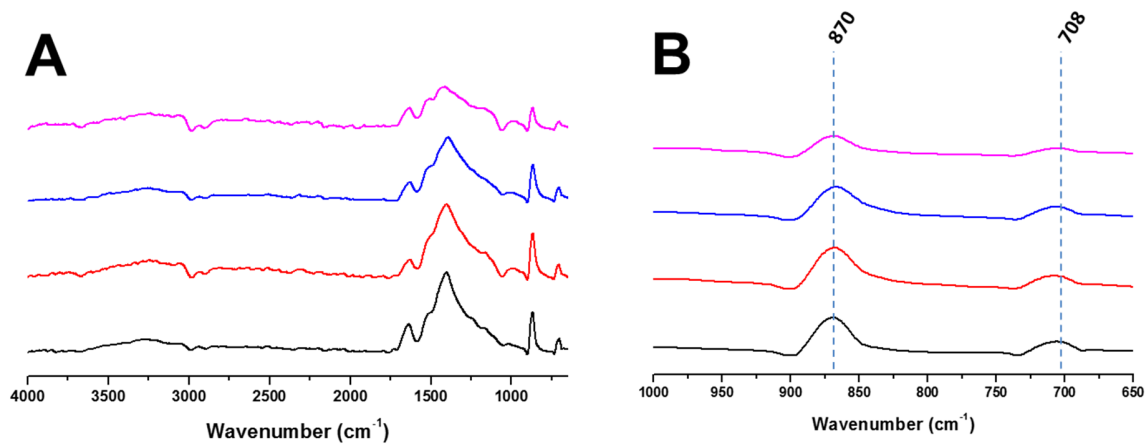

**(F) PSS-co-MA**

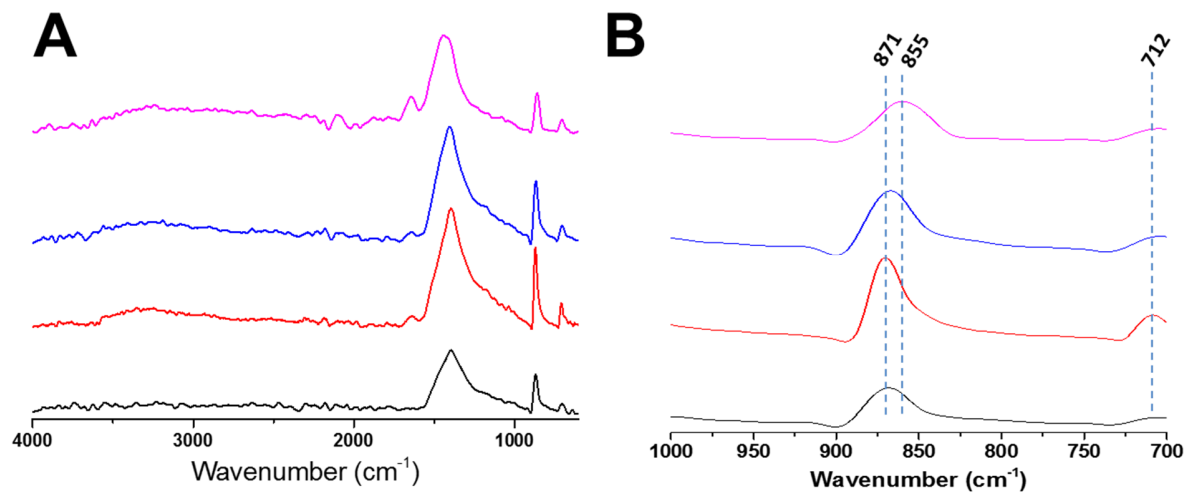

Supplement: s1 [file s1]
